# Supplementary material for: La2Sn2O7 enhanced photocatalytic CO2 reduction with H2O by deposition of Au co-catalyst
Source: Royal Society of Chemistry journal article supplement (doi:10.1039/c7ra00765e), 2017-01-01
Supplement: c7ra00765e1.pdf [file c7ra00765e1.pdf]

## **Electronic Supplementary Information**

### **La<sub>2</sub>Sn<sub>2</sub>O<sub>7</sub> enhanced photocatalytic CO<sub>2</sub> reduction with H<sub>2</sub>O by deposition of Au cocatalyst**

Shuang Chen, Bao Pan, Longquan Zeng, Shijian Luo, Xuxu Wang, Wenyue Su\*

*State Key Laboratory of Photocatalysis on Energy and Environment,*

*Fuzhou University, Fuzhou, 350002, P. R. China*

*Corresponding author Tel & Fax: (+86)591-83779237.*

*E-mail: [suweny@fzu.edu.cn](mailto:suweny@fzu.edu.cn)*

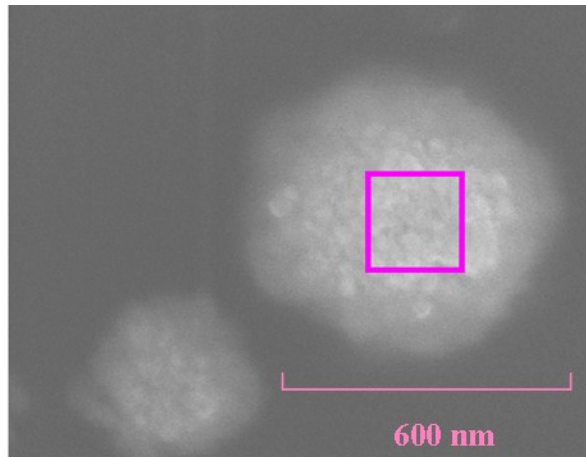

SEM

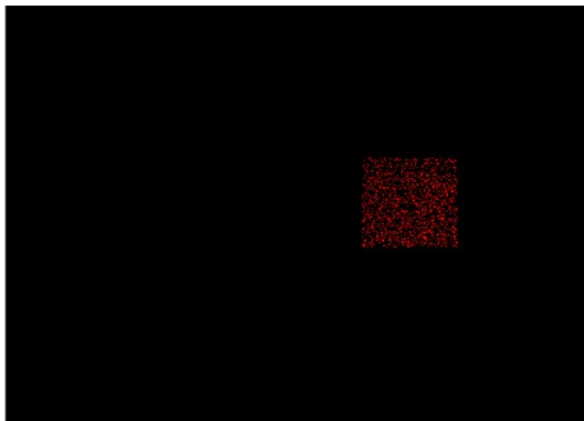

La La1

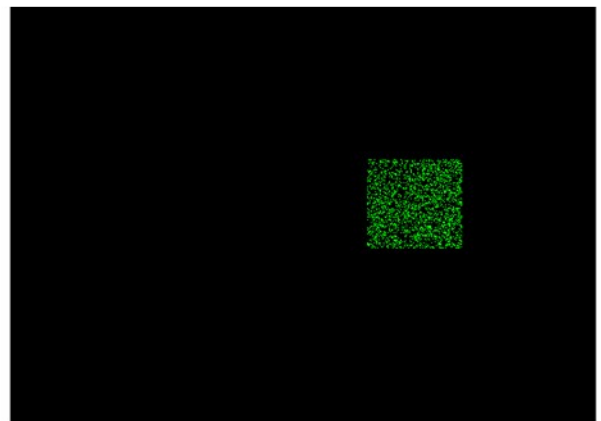

Sn La1

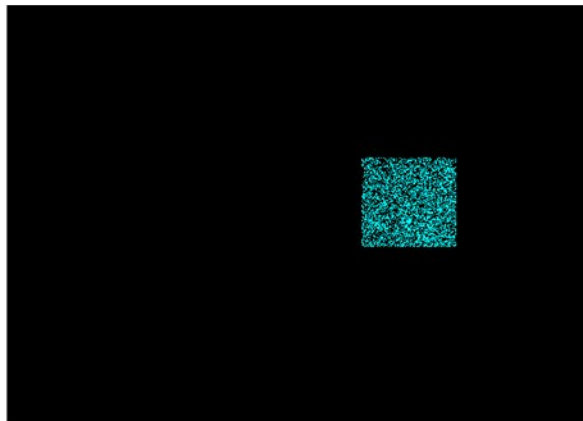

O Ka1

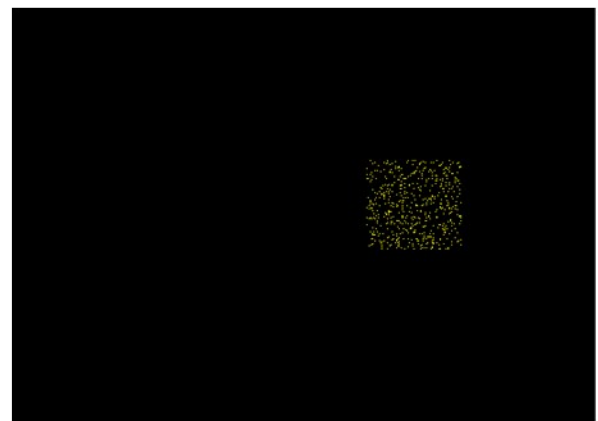

Au Ma1

**Fig. S1** EDX-mapping images of the 1 wt% Au/La<sub>2</sub>Sn<sub>2</sub>O<sub>7</sub> sample.

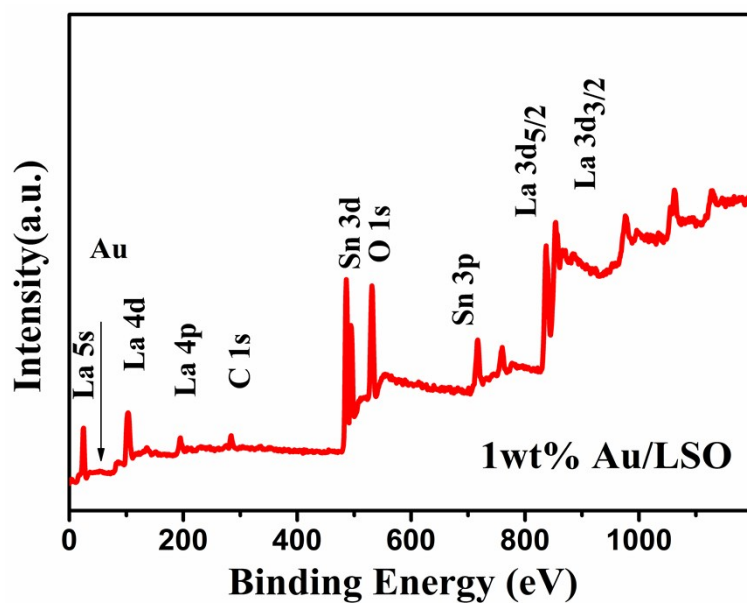

Fig. S2 XPS survey spectrum of the 1 wt% Au/La<sub>2</sub>Sn<sub>2</sub>O<sub>7</sub> sample.

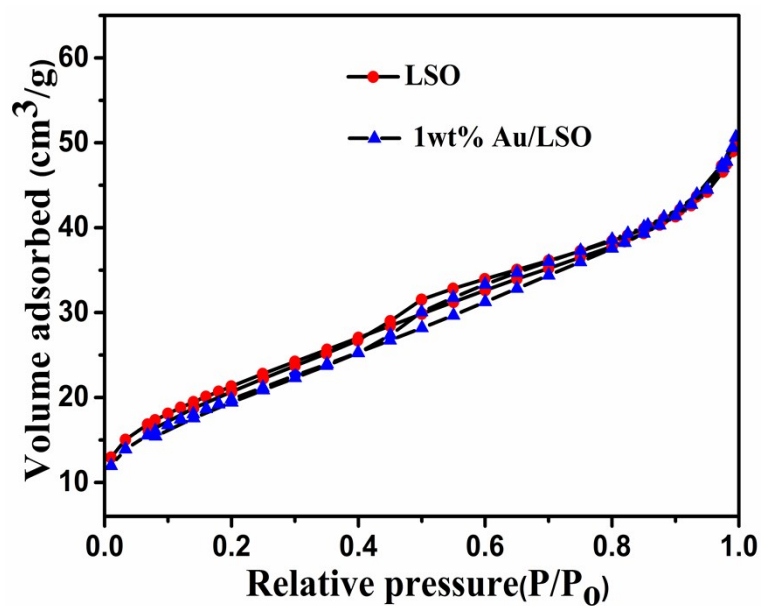

Fig. S3 N<sub>2</sub> adsorption/desorption isotherms (77 K) of La<sub>2</sub>Sn<sub>2</sub>O<sub>7</sub> and 1 wt% Au/La<sub>2</sub>Sn<sub>2</sub>O<sub>7</sub> samples.

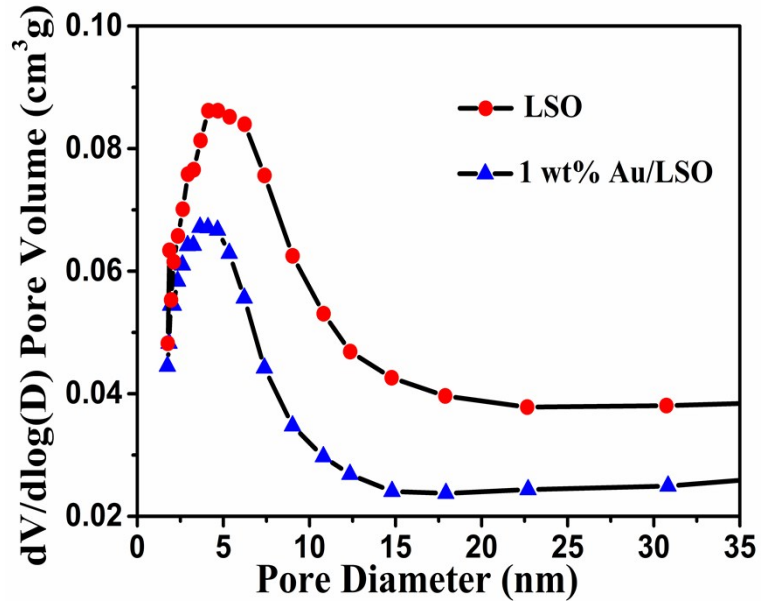

Fig. S4 Pore size distribution curves of La<sub>2</sub>Sn<sub>2</sub>O<sub>7</sub> and 1 wt% Au/La<sub>2</sub>Sn<sub>2</sub>O<sub>7</sub> samples

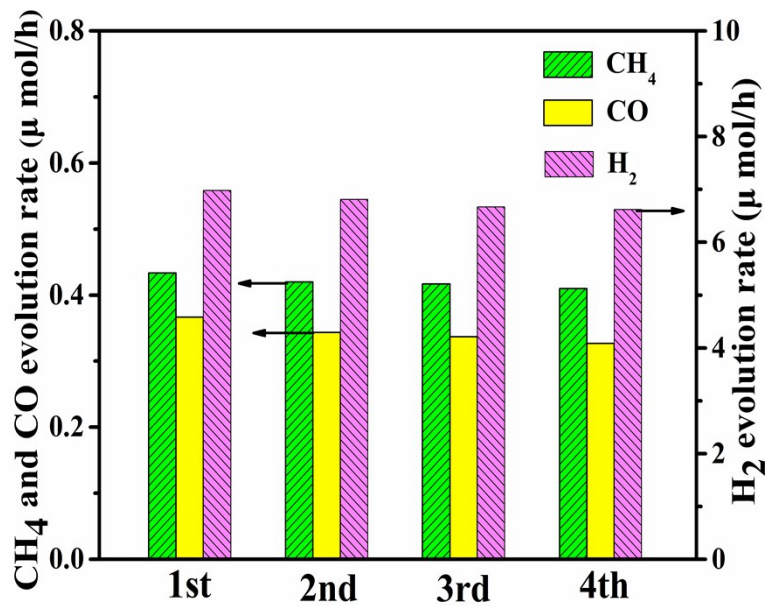

Fig. S5 The stability test of 1wt% Au/La<sub>2</sub>Sn<sub>2</sub>O<sub>7</sub> sample for CO<sub>2</sub> reduction with H<sub>2</sub>O during four repeats of reaction.

**Table S1** The loading amount of Au in the prepared samples.

| Samples         | Au loading (wt.%) |        |
|-----------------|-------------------|--------|
|                 | Intended          | Actual |
| 0.5 wt.% Au/LSO | 0.5               | 0.33   |
| 1.0 wt.% Au/LSO | 1.0               | 0.51   |
| 2.0 wt.% Au/LSO | 2.0               | 1.20   |
| 3.0 wt.% Au/LSO | 3.0               | 1.84   |

**Table S2** The photocatalytic CO<sub>2</sub> reduction activity of La<sub>2</sub>Sn<sub>2</sub>O<sub>7</sub>, Au/La<sub>2</sub>Sn<sub>2</sub>O<sub>7</sub> and P25 samples.

| Catalysts                                                 | CH <sub>4</sub><br>( $\mu\text{mol}$ ) | CO<br>( $\mu\text{mol}$ ) | H <sub>2</sub><br>( $\mu\text{mol}$ ) | AQY<br>(%) |
|-----------------------------------------------------------|----------------------------------------|---------------------------|---------------------------------------|------------|
| La <sub>2</sub> Sn <sub>2</sub> O <sub>7</sub>            | 0.60                                   | 0.31                      | 6.90                                  | 0.90       |
| P25                                                       | 0.58                                   | 0.21                      | 4.70                                  | 0.68       |
| 0.5 wt% Au/La <sub>2</sub> Sn <sub>2</sub> O <sub>7</sub> | 0.76                                   | 0.56                      | 9.86                                  | 1.26       |
| 1 wt% Au/La <sub>2</sub> Sn <sub>2</sub> O <sub>7</sub>   | 1.30                                   | 1.10                      | 20.94                                 | 2.54       |
| 2 wt% Au/La <sub>2</sub> Sn <sub>2</sub> O <sub>7</sub>   | 1.26                                   | 1.00                      | 15.89                                 | 0.56       |
| 3 wt% Au/La <sub>2</sub> Sn <sub>2</sub> O <sub>7</sub>   | 0.82                                   | 0.77                      | 12.63                                 | 0.38       |

**Reaction conditions:** sample (50mg), H<sub>2</sub>O (140 mL), 125 W high-pressure mercury lamp, CO<sub>2</sub> (1 atm), T (20 °C), illumination time (3 h).
